# Supplementary material
Source: publisher site journal article supplement (https://kjim.org/upload/media/kjim-2024-288-Supplementary-Table-3.pdf)
Supplement: Supplementary file 1 [file kjim-2024-288-Supplementary-Table-3.pdf]

**Supplementary Table 3. Physical activity categorized by age, sex, and COVID-19**

| Category          | All population |               |                | Male          |               |                | Female        |               |                |
|-------------------|----------------|---------------|----------------|---------------|---------------|----------------|---------------|---------------|----------------|
|                   | 19–49 yr       | ≥ 50 yr       | <i>p</i> value | 19–49 yr      | ≥ 50 yr       | <i>p</i> value | 19–49 yr      | ≥ 50 yr       | <i>p</i> value |
| Before Covid-19   |                |               |                |               |               |                |               |               |                |
| Physical activity |                |               | 0.029          |               |               | 0.088          |               |               | 0.186          |
| No                | 1,720 (38.17)  | 1,566 (40.51) |                | 844 (38.54)   | 835 (41.11)   |                | 876 (37.82)   | 731 (39.84)   |                |
| Yes               | 2,786 (61.83)  | 2,300 (59.49) |                | 1,346 (61.46) | 1,196 (58.89) |                | 1,440 (62.18) | 1,104 (60.16) |                |
| After Covid-19    |                |               |                |               |               |                |               |               |                |
| Physical activity |                |               | 0.965          |               |               | 0.956          |               |               | 0.923          |
| No                | 1,459 (39.01)  | 1,323 (39.06) |                | 744 (40.70)   | 744 (40.61)   |                | 715 (37.40)   | 579 (37.23)   |                |
| Yes               | 2,281 (60.99)  | 2,064 (60.94) |                | 1,084 (59.30) | 1,088 (59.39) |                | 1,197 (62.60) | 976 (62.77)   |                |

Values are presented as number (%).

The *p* value was derived by the chi-square test.
